# Supplementary material
Source: Springer Nature journal article supplement (https://www.springermedizin.de/resource/supplementary/12986_2014_611_MOESM2_ESM.pdf/25655140)

## Primary outcomes

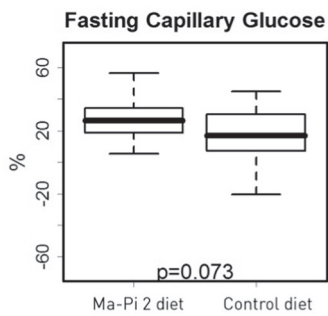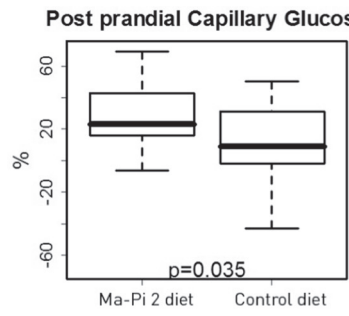

## Secondary outcomes

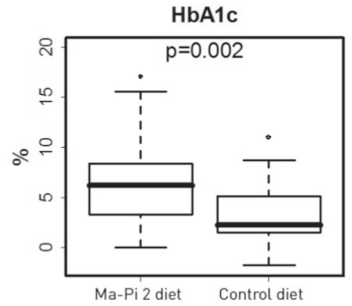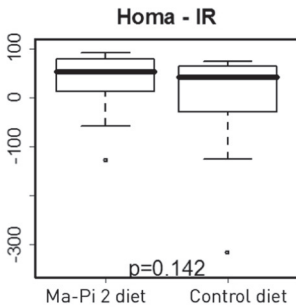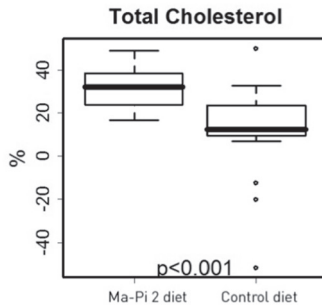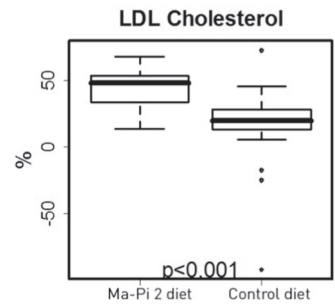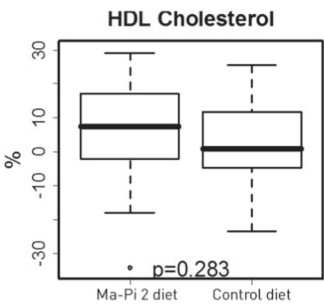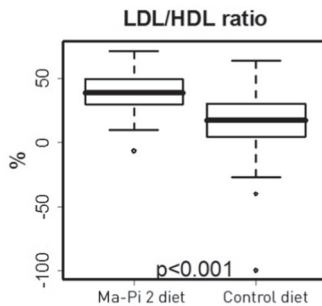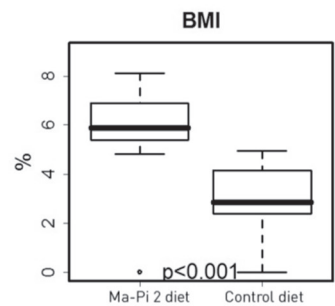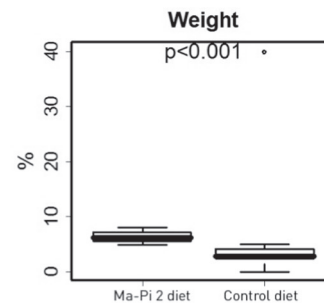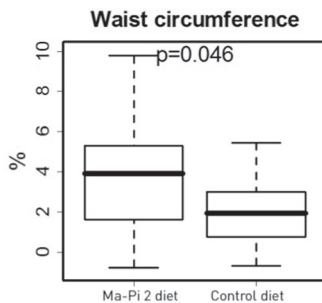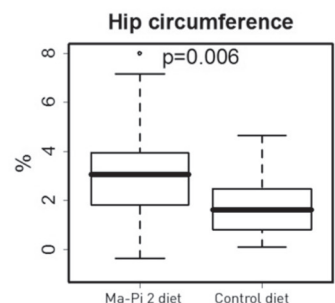

Supplement: MOESM2 [file 25655140]
